# Supplementary material for: Common cuckoos (Cuculus canorus) affect the bacterial diversity of the eggshells of their great reed warbler (Acrocephalus arundinaceus) hosts
Source: PubMed Central journal article supplement (PMC5774785; doi:10.1371/journal.pone.0191364), 2018-01-19
Supplement: pone.0191364.s001.pdf [file pone.0191364.s001.pdf]

**Table S1** Identification of the 177 bacterial strains isolated from the eggshells of common cuckoo and great reed warbler, based on BLAST analysis of the 16S rRNA gene sequences

| Nest ID | Representative isolate ID | Treatment | Type of medium | Colony color | Cell morphology    | Gram stain | Nearest phylogenetic neighbor | 16S rRNA gene sequence similarity in % | Accession   | Phylum         |
|---------|---------------------------|-----------|----------------|--------------|--------------------|------------|-------------------------------|----------------------------------------|-------------|----------------|
| 11      | 55_5                      | pci       | TSA            | white        | rod                | -          | Acinetobacter sp.             | 99%                                    | JX137278.1  | Proteobacteria |
|         | 55_1                      | pci       | TSA            | red          | rod to cocci       | +          | Arthrobacter agilis           | 99%                                    | FR682668.1  | Proteobacteria |
|         | 52_1                      | pci       | TSA            | white        | rod                | +          | Bacillus amyloliquefaciens    | 100%                                   | KP334099.1  | Firmicutes     |
|         | 50_7                      | pci       | TSA            | white        | rod                | +          | Bacillus subtilis             | 100%                                   | CP011534.1  | Firmicutes     |
|         | 52_23                     | pgi       | TSA            | orange       | ovoid or short rod | +          | Exiguobacterium undae         | 100%                                   | NR_043477.1 | Firmicutes     |
|         | 43_34                     | pgi       | HE             | green        | rod                | -          | Pseudomonas fluorescens       | 100%                                   | CP003041.1  | Proteobacteria |
|         | 46_30                     | pgi       | TSA            | white        | rod                | -          | Pseudomonas fluorescens       | 100%                                   | CP003041.1  | Proteobacteria |
|         | 49_1                      | pgi       | TSA            | white        | rod                | -          | Pseudomonas fluorescens       | 100%                                   | CP003041.1  | Proteobacteria |
| 20      | 50_1                      | ngn       | TSA            | white        | rod                | +          | Bacillus pumilus              | 100%                                   | KR088392.1  | Firmicutes     |
|         | 50_2                      | ngn       | TSA            | white        | rod                | +          | Bacillus pumilus              | 100%                                   | KR088392.1  | Firmicutes     |
|         | 51_31                     | ngn       | TSA            | orange       | rod                | -          | Pseudomonas fluorescens       | 100%                                   | CP005975.1  | Proteobacteria |
| 22      | 54_24                     | pci       | TSA            | orange       | rod                | +          | Bacillus cereus               | 100%                                   | KT354272.1  | Firmicutes     |
|         | 54_28                     | pci       | TSA            | orange       | rod                | -          | Brevundimonas vesicularis     | 99%                                    | AJ007801.1  | Proteobacteria |
|         | 50_21                     | pci       | TSA            | white        | rod                | -          | Pseudomonas reinekei          | 100%                                   | NR_042541.1 | Proteobacteria |
|         | 54_1                      | pgi       | TSA            | orange       | rod                | +          | Bacillus pumilus              | 100%                                   | KR088392.1  | Firmicutes     |
|         | 54_2                      | pgi       | TSA            | orange       | rod                | +          | Bacillus pumilus              | 100%                                   | KR088392.1  | Firmicutes     |
| 39      | 49_9                      | pcn       | TSA            | white        | rod                | +          | Bacillus pumilus              | 100%                                   | KR088392.1  | Firmicutes     |
|         | 53_35                     | pgn       | TSA            | orange       | ovoid or short rod | +          | Exiguobacterium undae         | 100%                                   | NR_043477.1 | Firmicutes     |
| 40      | 40_3                      | pci       | VJ             | black        | rod                | -          | Acinetobacter lwoffii         | 100%                                   | KR054982.1  | Proteobacteria |
|         | 40_4                      | pci       | VJ             | black        | ovoid or short rod | +          | Exiguobacterium undae         | 100%                                   | NR_043477.1 | Firmicutes     |
|         | 48_1                      | pgi       | TSA            | white        | rod                | -          | Acinetobacter johnsonii       | 99%                                    | AB681724.1  | Proteobacteria |
|         | 52_25                     | pgi       | TSA            | white        | rod                | -          | Acinetobacter johnsonii       | 99%                                    | LN774366.1  | Proteobacteria |
|         | 48_23                     | pgi       | TSA            | white        | rod                | -          | Pseudomonas lurida            | 100%                                   | NR_042199.1 | Proteobacteria |
| 45      | 52_27                     | pgi       | TSA            | orange       | ovoid or short rod | +          | Exiguobacterium undae         | 100%                                   | NR_043477.1 | Firmicutes     |
| 47      | 48_31                     | ngn       | TSA            | white        | rod                | +          | Bacillus pumilus              | 100%                                   | KR088392.1  | Firmicutes     |
|         | 50_12                     | ngn       | TSA            | white        | rod                | +          | Bacillus pumilus              | 100%                                   | KR088392.1  | Firmicutes     |
|         | 50_13                     | ngn       | TSA            | white        | rod                | +          | Bacillus pumilus              | 100%                                   | KR088392.1  | Firmicutes     |
|         | 53_29                     | ngn       | TSA            | orange       | rod                | +          | Bacillus thuringiensis        | 99%                                    | AP014864.1  | Firmicutes     |
| 51      | 49_14                     | ngi       | TSA            | white        | rod                | +          | Bacillus pumilus              | 100%                                   | KR088392.1  | Firmicutes     |
| 52      | 47_11                     | ngn       | TSA            | white        | rod                | -          | Acinetobacter johnsonii       | 100%                                   | KC790286.1  | Proteobacteria |

**Table S1** (continued)

| Nest ID | Representative isolate ID | Treatment | Type of medium | Colony color  | Cell morphology    | Gram stain | Nearest phylogenetic neighbor         | 16S rRNA gene sequence similarity in % | Accession   | Phylum         |
|---------|---------------------------|-----------|----------------|---------------|--------------------|------------|---------------------------------------|----------------------------------------|-------------|----------------|
|         | 51_22                     | ngn       | TSA            | orange        | ovoid or short rod | +          | <i>Exiguobacterium undae</i>          | 100%                                   | AY444838.1  | Firmicutes     |
|         | 50_20                     | ngn       | TSA            | white         | rod                | -          | <i>Pseudomonas fluorescens</i>        | 100%                                   | KR054991.1  | Proteobacteria |
|         | 44_1                      | ngn       | HE             | green         | rod                | -          | <i>Pseudomonas</i> sp.                | 100%                                   | KR088657.1  | Proteobacteria |
| 101     | 51_34                     | ngi       | TSA            | white         | rod                | +          | <i>Bacillus amyloliquefaciens</i>     | 100%                                   | KT833128.1  | Firmicutes     |
| 209     | 46_34                     | pcn       | TSA            | white         | rod                | +          | <i>Bacillus pumilus</i>               | 100%                                   | KR088392.1  | Firmicutes     |
|         | 53_19                     | pcn       | TSA            | orange        | ovoid or short rod | +          | <i>Exiguobacterium undae</i>          | 100%                                   | NR_043477.1 | Firmicutes     |
|         | 48_11                     | pcn       | TSA            | white-orange  | rod                | -          | <i>Stenotrophomonas rhizophila</i>    | 100%                                   | KR055001.1  | Proteobacteria |
|         | 55_15                     | pgn       | TSA            | yellow-orange | rod                | -          | <i>Chryseobacterium indoltheticum</i> | 100%                                   | NR_042926.1 | Bacteroidetes  |
|         | 46_5                      | pgn       | TSA            | white         | rod                | -          | <i>Pseudomonas orientalis</i>         | 100%                                   | KC834315.1  | Proteobacteria |
|         | 50_29                     | pgn       | TSA            | white         | rod                | -          | <i>Pseudomonas orientalis</i>         | 100%                                   | KC834315.1  | Proteobacteria |
|         | 50_31                     | pgn       | TSA            | white         | rod                | -          | <i>Pseudomonas orientalis</i>         | 100%                                   | KC834315.1  | Proteobacteria |
|         | 53_10                     | pgn       | TSA            | orange        | rod                | -          | <i>Stenotrophomonas rhizophila</i>    | 100%                                   | KR055001.1  | Proteobacteria |
| 210     | 47_12                     | ngn       | TSA            | white         | rod                | -          | <i>Acinetobacter calcoaceticus</i>    | 100%                                   | KR088359.1  | Proteobacteria |
|         | 42_34                     | ngn       | HE             | green         | rod                | -          | <i>Pantoea agglomerans</i>            | 99%                                    | FJ357809.1  | Proteobacteria |
|         | 42_31                     | ngn       | HE             | green         | rod                | -          | <i>Pseudomonas lurida</i>             | 100%                                   | NR_042199.1 | Proteobacteria |
|         | 54_37                     | ngn       | TSA            | orange        | rod                | -          | <i>Pseudomonas putida</i>             | 100%                                   | KC195899.1  | Proteobacteria |
|         | 48_14                     | ngn       | TSA            | white-brown   | rod                | -          | <i>Stenotrophomonas rhizophila</i>    | 100%                                   | KR055001.1  | Proteobacteria |
|         | 53_37                     | ngn       | TSA            | orange        | rod                | -          | <i>Stenotrophomonas rhizophila</i>    | 99%                                    | KR055001.1  | Proteobacteria |
| 217     | 44_2                      | pgi       | HE             | green         | rod                | -          | <i>Acinetobacter calcoaceticus</i>    | 100%                                   | JQ781626.1  | Proteobacteria |
|         | 47_2                      | pgi       | TSA            | white         | rod                | -          | <i>Acinetobacter calcoaceticus</i>    | 100%                                   | KR088359.1  | Proteobacteria |
|         | 42_10                     | pgi       | HE             | green         | rod                | -          | <i>Erwinia rhapontici</i>             | 99%                                    | KR054974.1  | Proteobacteria |
|         | 52_29                     | pgi       | TSA            | orange        | ovoid or short rod | +          | <i>Exiguobacterium undae</i>          | 100%                                   | NR_043477.1 | Firmicutes     |
|         | 44_10                     | pgi       | HE             | green         | rod                | -          | <i>Pseudomonas orientalis</i>         | 100%                                   | KC834315.1  | Proteobacteria |
| 222     | 44_17                     | ngn       | HE             | green         | rod                | -          | <i>Pseudomonas fluorescens</i>        | 99%                                    | EU439419.1  | Proteobacteria |
|         | 47_22                     | ngn       | TSA            | white         | rod                | -          | <i>Pseudomonas fluorescens</i>        | 100%                                   | NR_102835.1 | Proteobacteria |
| 224     | 46_36                     | pcn       | TSA            | white         | cocci              | +          | <i>Staphylococcus caprae</i>          | 99%                                    | KR632505.1  | Firmicutes     |
|         | 53_16                     | pgn       | TSA            | orange        | rod                | -          | <i>Pseudomonas fluorescens</i>        | 100%                                   | CP003041.1  | Proteobacteria |
| 232     | 51_24                     | pci       | TSA            | white         | rod                | -          | <i>Acinetobacter</i> sp.              | 100%                                   | KR088441.1  | Proteobacteria |
|         | 55_17                     | pci       | TSA            | white         | rod                | -          | <i>Acinetobacter</i> sp.              | 100%                                   | KR088441.1  | Proteobacteria |
|         | 55_3                      | pci       | TSA            | white         | rod                | -          | <i>Acinetobacter</i> sp.              | 100%                                   | KR088441.1  | Proteobacteria |

**Table S1** (continued)

| Nest ID | Representative isolate ID | Treatment | Type of medium | Colony color  | Cell morphology    | Gram stain | Nearest phylogenetic neighbor         | 16S rRNA gene sequence similarity in % | Accession   | Phylum         |
|---------|---------------------------|-----------|----------------|---------------|--------------------|------------|---------------------------------------|----------------------------------------|-------------|----------------|
|         | 55_12_2                   | pci       | TSA            | pale yellow   | rod                | +          | <i>Arthrobacter nitroguajacolicus</i> | 100%                                   | HF584979.1  | Proteobacteria |
|         | 54_10                     | pci       | TSA            | orange        | rod                | +          | <i>Bacillus pumilus</i>               | 100%                                   | KR088392.1  | Firmicutes     |
|         | 54_8                      | pci       | TSA            | orange        | rod                | +          | <i>Bacillus pumilus</i>               | 100%                                   | KR088392.1  | Firmicutes     |
|         | 55_16                     | pgi       | TSA            | yellow-orange | rod                | +          | <i>Exiguobacterium acetylicum</i>     | 99%                                    | NR_043479.1 | Firmicutes     |
|         | 42_37                     | pgi       | HE             | green         | rod                | -          | <i>Pseudomonas putida</i>             | 100%                                   | AP013070.1  | Proteobacteria |
|         | 43_38                     | pgi       | HE             | green         | rod                | -          | <i>Pseudomonas putida</i>             | 100%                                   | AP013070.1  | Proteobacteria |
|         | 47_7                      | pgi       | TSA            | white         | rod                | -          | <i>Pseudomonas putida</i>             | 100%                                   | AP013070.1  | Proteobacteria |
|         | 49_3                      | pgi       | TSA            | white         | rod                | -          | <i>Pseudomonas putida</i>             | 100%                                   | AP013070.1  | Proteobacteria |
| 249     | 50_41                     | pci       | TSA            | white         | rod                | +          | <i>Bacillus pumilus</i>               | 100%                                   | KR088392.1  | Firmicutes     |
|         | 54_34                     | pci       | TSA            | orange        | cocci              | +          | <i>Kocuria rhizophila</i>             | 99%                                    | NR_074786.1 | Actinobacteria |
|         | 50_34                     | pci       | TSA            | white         | rod                | -          | <i>Pseudomonas fluorescens</i>        | 100%                                   | CP005975.1  | Proteobacteria |
|         | 46_29                     | pci       | TSA            | white         | rod                | -          | <i>Pseudomonas orientalis</i>         | 100%                                   | KC834315.1  | Proteobacteria |
|         | 47_4                      | pgi       | TSA            | white         | rod                | +          | <i>Bacillus pumilus</i>               | 100%                                   | KR088392.1  | Firmicutes     |
|         | 52_12                     | pgi       | TSA            | orange        | rod                | +          | <i>Exiguobacterium acetylicum</i>     | 99%                                    | NR_043479.1 | Firmicutes     |
| 509     | 52_2_1                    | pci       | TSA            | white         | rod                | -          | <i>Acinetobacter johnsonii</i>        | 99%                                    | LN774366.1  | Proteobacteria |
|         | 47_40                     | pci       | TSA            | white         | rod                | -          | <i>Acinetobacter lwoffii</i>          | 100%                                   | KR054982.1  | Proteobacteria |
|         | 42_24                     | pci       | HE             | green         | rod                | -          | <i>Enterobacter amnigenus</i>         | 99%                                    | HF562865.1  | Proteobacteria |
|         | 42_25                     | pci       | HE             | green         | rod                | -          | <i>Enterobacter amnigenus</i>         | 99%                                    | HF562865.1  | Proteobacteria |
|         | 42_6                      | pci       | HE             | green         | rod                | -          | <i>Enterobacter amnigenus</i>         | 99%                                    | DQ223879.1  | Proteobacteria |
|         | 42_7                      | pci       | HE             | green         | rod                | -          | <i>Enterobacter amnigenus</i>         | 99%                                    | DQ223879.1  | Proteobacteria |
|         | 44_13                     | pci       | HE             | green         | rod                | -          | <i>Enterobacter amnigenus</i>         | 99%                                    | HF562865.1  | Proteobacteria |
|         | 40_24                     | pci       | VJ             | black         | ovoid or short rod | +          | <i>Exiguobacterium undae</i>          | 100%                                   | NR_043477.1 | Firmicutes     |
|         | 44_14                     | pci       | HE             | green         | rod                | -          | <i>Lelliottia amnigena</i>            | 99%                                    | KR054963.1  | Proteobacteria |
|         | 51_1                      | pci       | TSA            | white         | rod                | -          | <i>Pseudomonas fluorescens</i>        | 100%                                   | CP005975.1  | Proteobacteria |
|         | 52_2_2                    | pci       | TSA            | pale orange   | rod                | -          | <i>Sphingobacterium faecium</i>       | 99%                                    | FJ950587.1  | Bacteroidetes  |
|         | 47_19                     | pgi       | TSA            | white         | rod                | -          | <i>Acinetobacter johnsonii</i>        | 99%                                    | AB681724.1  | Proteobacteria |
|         | 40_42                     | pgi       | VJ             | black         | rod                | +          | <i>Bacillus subtilis</i>              | 100%                                   | CP011534.1  | Firmicutes     |
|         | 49_6                      | pgi       | TSA            | white         | rod                | -          | <i>Comamonas terrigena</i>            | 99%                                    | JF703644.1  | Proteobacteria |
|         | 40_28                     | pgi       | VJ             | black         | ovoid or short rod | +          | <i>Exiguobacterium undae</i>          | 100%                                   | NR_043477.1 | Firmicutes     |
|         | 49_5                      | pgi       | TSA            | white         | rod                | -          | <i>Pseudomonas fluorescens</i>        | 100%                                   | KR054992.1  | Proteobacteria |

**Table S1** (continued)

| Nest ID | Representative isolate ID | Treatment | Type of medium | Colony color | Cell morphology    | Gram stain         | Nearest phylogenetic neighbor     | 16S rRNA gene sequence similarity in % | Accession   | Phylum         |
|---------|---------------------------|-----------|----------------|--------------|--------------------|--------------------|-----------------------------------|----------------------------------------|-------------|----------------|
| 520     | 43_30                     | pgi       | HE             | green        | rod                | -                  | <i>Pseudomonas putida</i>         | 99%                                    | EU118779.1  | Proteobacteria |
|         | 44_8                      | pgi       | HE             | green        | rod                | -                  | <i>Acinetobacter</i> sp.          | 99%                                    | JX899632.1  | Proteobacteria |
|         | 47_27                     | pgi       | TSA            | white        | rod                | -                  | <i>Acinetobacter</i> sp.          | 100%                                   | LN870383.1  | Proteobacteria |
|         | 52_15                     | pgi       | TSA            | white        | rod                | +                  | <i>Bacillus amyloliquefaciens</i> | 100%                                   | KT833128.1  | Firmicutes     |
|         | 42_14                     | pgi       | HE             | green        | rod                | -                  | <i>Pantoea anthophila</i>         | 99%                                    | NR_116113.1 | Proteobacteria |
|         | 52_14                     | pgi       | TSA            | orange       | rod                | -                  | <i>Pantoea anthophila</i>         | 99%                                    | NR_116113.1 | Proteobacteria |
| 521     | 47_35                     | pgi       | TSA            | white        | rod                | -                  | <i>Pseudomonas reinekei</i>       | 100%                                   | NR_042541.1 | Proteobacteria |
|         | 48_12                     | pcn       | TSA            | white        | rod                | -                  | <i>Acinetobacter johnsonii</i>    | 100%                                   | KC790286.1  | Proteobacteria |
|         | 40_18                     | pcn       | VJ             | black        | ovoid or short rod | +                  | <i>Exiguobacterium undae</i>      | 100%                                   | NR_043477.1 | Firmicutes     |
|         | 43_1                      | pcn       | HE             | green        | rod                | -                  | <i>Pseudomonas putida</i>         | 100%                                   | FM211694.1  | Proteobacteria |
|         | 40_8                      | pgn       | VJ             | black        | rod                | +                  | <i>Bacillus subtilis</i>          | 100%                                   | CP011534.1  | Firmicutes     |
|         | 40_37                     | pgn       | VJ             | black        | ovoid or short rod | +                  | <i>Exiguobacterium undae</i>      | 100%                                   | NR_043477.1 | Firmicutes     |
|         | 48_27                     | pgn       | TSA            | white        | rod                | -                  | <i>Pseudomonas fluorescens</i>    | 100%                                   | KR054992.1  | Proteobacteria |
|         | 48_29                     | pgn       | TSA            | white        | rod                | -                  | <i>Pseudomonas fluorescens</i>    | 100%                                   | KR054992.1  | Proteobacteria |
|         | 40_7                      | pgn       | VJ             | black        | rod                | -                  | <i>Pseudomonas putida</i>         | 100%                                   | KC195899.1  | Proteobacteria |
|         | 523                       | 51_43     | pcn            | TSA          | orange             | ovoid or short rod | +                                 | <i>Exiguobacterium undae</i>           | 100%        | NR_043477.1    |
| 46_37   |                           | pcn       | TSA            | white        | rod                | -                  | <i>Pseudomonas poae</i>           | 100%                                   | CP004045.1  | Proteobacteria |
| 49_21   |                           | pcn       | TSA            | white        | rod                | -                  | <i>Pseudomonas putida</i>         | 100%                                   | AP013070.1  | Proteobacteria |
| 51_26   |                           | pcn       | TSA            | orange       | rod                | -                  | <i>Pseudomonas rhizosphaerae</i>  | 100%                                   | LN774439.1  | Proteobacteria |
| 51_16   |                           | pgn       | TSA            | white        | rod                | +                  | <i>Bacillus pumilus</i>           | 100%                                   | KR088392.1  | Firmicutes     |
| 51_29   |                           | pgn       | TSA            | orange       | rod                | +                  | <i>Bacillus thuringiensis</i>     | 100%                                   | AP014864.1  | Firmicutes     |
| 526     | 51_37                     | pgn       | TSA            | white        | rod                | +                  | <i>Bacillus amyloliquefaciens</i> | 100%                                   | KT833128.1  | Firmicutes     |
| 540     | 54_12                     | ngn       | TSA            | orange       | cocci              | +                  | <i>Kocuria rhizophila</i>         | 99%                                    | NR_074786.1 | Actinobacteria |
|         | 48_6                      | ngn       | TSA            | white        | rod                | -                  | <i>Pseudomonas putida</i>         | 100%                                   | KC195899.1  | Proteobacteria |
|         | 46_16                     | ngn       | TSA            | white        | rod                | -                  | <i>Pseudomonas syringae</i>       | 100%                                   | CP005970.1  | Proteobacteria |
| 541     | 43_21                     | ngi       | HE             | green        | rod                | -                  | <i>Pseudomonas putida</i>         | 100%                                   | FM211694.1  | Proteobacteria |
|         | 52_4                      | ngi       | TSA            | orange       | rod                | -                  | <i>Pseudomonas putida</i>         | 100%                                   | FM211694.1  | Proteobacteria |
| 542     | 50_5                      | pci       | TSA            | white        | rod                | +                  | <i>Bacillus pumilus</i>           | 100%                                   | KR088392.1  | Firmicutes     |
|         | 52_6                      | pci       | TSA            | orange       | rod                | -                  | <i>Pseudomonas putida</i>         | 100%                                   | FM211694.1  | Proteobacteria |
|         | 52_16                     | pgi       | TSA            | orange       | ovoid or short rod | +                  | <i>Exiguobacterium undae</i>      | 100%                                   | NR_043477.1 | Firmicutes     |

**Table S1** (continued)

| Nest ID | Representative isolate ID | Treatment | Type of medium | Colony color  | Cell morphology    | Gram stain | Nearest phylogenetic neighbor     | 16S rRNA gene sequence similarity in % | Accession   | Phylum         |
|---------|---------------------------|-----------|----------------|---------------|--------------------|------------|-----------------------------------|----------------------------------------|-------------|----------------|
| 545     | 46_24                     | pgi       | TSA            | white         | rod                | +          | <i>Sporosarcina globispora</i>    | 100%                                   | AM237400.1  | Firmicutes     |
|         | 51_18                     | ngn       | TSA            | white         | rod                | +          | <i>Bacillus amyloliquefaciens</i> | 100%                                   | KT833128.1  | Firmicutes     |
|         | 53_31                     | ngn       | TSA            | orange        | ovoid or short rod | +          | <i>Exiguobacterium undae</i>      | 100%                                   | NR_043477.1 | Firmicutes     |
| 556     | 54_14                     | ngn       | TSA            | orange        | cocci              | +          | <i>Kocuria rhizophila</i>         | 99%                                    | NR_074786.1 | Actinobacteria |
|         | 54_26                     | ngi       | TSA            | orange        | ovoid or short rod | +          | <i>Exiguobacterium undae</i>      | 100%                                   | NR_043477.1 | Firmicutes     |
| 557     | 49_13                     | pci       | TSA            | white         | rod                | +          | <i>Bacillus pumilus</i>           | 100%                                   | KR088392.1  | Firmicutes     |
|         | 48_24                     | pci       | TSA            | white         | rod                | -          | <i>Enterobacter aerogenes</i>     | 99%                                    | KF598982.1  | Proteobacteria |
| 558     | 52_10                     | pci       | TSA            | orange        | rod                | +          | <i>Exiguobacterium acetylicum</i> | 99%                                    | NR_043479.1 | Firmicutes     |
|         | 55_6                      | pci       | TSA            | yellow-orange | rod                | +          | <i>Exiguobacterium acetylicum</i> | 99%                                    | NR_043479.1 | Firmicutes     |
|         | 53_2                      | pgi       | TSA            | orange        | rod                | +          | <i>Bacillus pumilus</i>           | 100%                                   | KR088392.1  | Firmicutes     |
|         | 51_42                     | pgi       | TSA            | orange        | ovoid or short rod | +          | <i>Exiguobacterium undae</i>      | 100%                                   | NR_043477.1 | Firmicutes     |
|         | 53_1                      | pgi       | TSA            | orange        | rod                | -          | <i>Pseudomonas fluorescens</i>    | 100%                                   | KR054991.1  | Proteobacteria |
|         | 43_25                     | pgi       | HE             | green         | rod                | -          | <i>Pseudomonas putida</i>         | 100%                                   | EU118779.1  | Proteobacteria |
|         | 48_17                     | pcn       | TSA            | white         | rod                | -          | <i>Acinetobacter johnsonii</i>    | 100%                                   | KC790286.1  | Proteobacteria |
|         | 53_25                     | pcn       | TSA            | orange        | ovoid or short rod | +          | <i>Exiguobacterium undae</i>      | 100%                                   | NR_043477.1 | Firmicutes     |
|         | 51_33                     | pcn       | TSA            | orange        | rod                | -          | <i>Pantoea agglomerans</i>        | 99%                                    | FJ357809.1  | Proteobacteria |
|         | 42_27                     | pgn       | HE             | green         | rod                | -          | <i>Acinetobacter johnsonii</i>    | 99%                                    | LN774366.1  | Proteobacteria |
| 567     | 42_28                     | pgn       | HE             | green         | rod                | -          | <i>Acinetobacter johnsonii</i>    | 99%                                    | LN774366.1  | Proteobacteria |
|         | 48_2                      | pgn       | TSA            | white         | rod                | -          | <i>Acinetobacter johnsonii</i>    | 100%                                   | AB681724.1  | Proteobacteria |
|         | 53_7                      | ngn       | TSA            | orange        | rod                | -          | <i>Pseudomonas fluorescens</i>    | 100%                                   | CP003041.1  | Proteobacteria |
| 571     | 53_9                      | ngn       | TSA            | orange        | rod                | -          | <i>Pseudomonas putida</i>         | 100%                                   | AP013070.1  | Proteobacteria |
|         | 49_16                     | ngn       | TSA            | white         | rod                | +          | <i>Bacillus amyloliquefaciens</i> | 100%                                   | KT833128.1  | Firmicutes     |
|         | 47_26                     | ngn       | TSA            | white         | rod                | +          | <i>Bacillus pumilus</i>           | 100%                                   | KR088392.1  | Firmicutes     |
| 575     | 51_5                      | ngn       | TSA            | white         | rod                | +          | <i>Bacillus pumilus</i>           | 100%                                   | KR088392.1  | Firmicutes     |
|         | 54_20                     | ngn       | TSA            | orange        | cocci              | +          | <i>Kocuria rhizophila</i>         | 99%                                    | NR_074786.1 | Actinobacteria |
|         | 48_25                     | ngn       | TSA            | white         | rod                | -          | <i>Acinetobacter lwoffii</i>      | 100%                                   | KR054982.1  | Proteobacteria |
|         | 52_37                     | ngn       | TSA            | orange        | ovoid or short rod | +          | <i>Exiguobacterium undae</i>      | 100%                                   | NR_043477.1 | Firmicutes     |
| 606     | 54_22                     | ngn       | TSA            | orange        | cocci              | +          | <i>Kocuria rhizophila</i>         | 99%                                    | NR_074786.1 | Actinobacteria |
|         | 40_17                     | ngi       | VJ             | black         | ovoid or short rod | +          | <i>Exiguobacterium undae</i>      | 100%                                   | NR_043477.1 | Firmicutes     |
|         | 43_22                     | ngi       | HE             | green         | rod                | -          | <i>Pseudomonas corrugata</i>      | 99%                                    | HE586390.1  | Proteobacteria |

**Table S1** (continued)

| Nest ID | Representative isolate ID | Treatment | Type of medium | Colony color       | Cell morphology    | Gram stain | Nearest phylogenetic neighbor      | 16S rRNA gene sequence similarity in % | Accession   | Phylum         |
|---------|---------------------------|-----------|----------------|--------------------|--------------------|------------|------------------------------------|----------------------------------------|-------------|----------------|
| 609     | 52_36                     | ngi       | TSA            | orange             | rod                | -          | <i>Pseudomonas putida</i>          | 100%                                   | AP013070.1  | Proteobacteria |
|         | 50_6                      | pci       | TSA            | white              | rod                | +          | <i>Bacillus amyloliquefaciens</i>  | 100%                                   | KT833128.1  | Firmicutes     |
|         | 51_19                     | pci       | TSA            | white              | rod                | +          | <i>Bacillus subtilis</i>           | 100%                                   | CP011534.1  | Firmicutes     |
|         | 53_14                     | pci       | TSA            | orange             | ovoid or short rod | +          | <i>Exiguobacterium undae</i>       | 100%                                   | NR_043477.1 | Firmicutes     |
| 610     | 47_5                      | pgi       | TSA            | white              | rod                | +          | <i>Bacillus subtilis</i>           | 100%                                   | CP011534.1  | Firmicutes     |
|         | 47_33                     | pci       | TSA            | white              | rod                | +          | <i>Bacillus pumilus</i>            | 100%                                   | KR088392.1  | Firmicutes     |
|         | 49_11                     | pci       | TSA            | white              | rod                | +          | <i>Bacillus pumilus</i>            | 100%                                   | KR055035.1  | Firmicutes     |
|         | 40_43                     | pci       | VJ             | black              | ovoid or short rod | +          | <i>Exiguobacterium undae</i>       | 100%                                   | NR_043477.1 | Firmicutes     |
|         | 51_20                     | pci       | TSA            | translucent orange | rod                | -          | <i>Pseudomonas graminis</i>        | 100%                                   | HE648152.1  | Proteobacteria |
|         | 50_23                     | pci       | TSA            | dirty white        | rod                | -          | <i>Stenotrophomonas rhizophila</i> | 100%                                   | KR055001.1  | Proteobacteria |
|         | 52_33                     | pgi       | TSA            | white              | rod                | -          | <i>Acinetobacter lwoffii</i>       | 100%                                   | KR054982.1  | Proteobacteria |
|         | 40_32                     | pgi       | VJ             | black              | (coccoid) rod      | +          | <i>Carnobacterium divergens</i>    | 99%                                    | AB598939.1  | Firmicutes     |
|         | 40_33                     | pgi       | VJ             | black              | ovoid or short rod | +          | <i>Exiguobacterium undae</i>       | 100%                                   | NR_043477.1 | Firmicutes     |
|         | 52_34                     | pgi       | TSA            | orange             | rod                | -          | <i>Pseudomonas fluorescens</i>     | 100%                                   | CP003041.1  | Proteobacteria |
|         | 717                       | 43_10     | pcn            | HE                 | green              | rod        | -                                  | <i>Erwinia persicina</i>               | 99%         | LM651373.1     |
| 49_19   |                           | pcn       | TSA            | white              | rod                | -          | <i>Erwinia persicina</i>           | 99%                                    | LM651373.1  | Proteobacteria |
| 40_1    |                           | pgn       | VJ             | translucent        | rod                | -          | <i>Acinetobacter lwoffii</i>       | 100%                                   | KR054982.1  | Proteobacteria |
| 40_2    |                           | pgn       | VJ             | translucent        | rod                | -          | <i>Acinetobacter lwoffii</i>       | 100%                                   | KR054982.1  | Proteobacteria |
| 48_4    |                           | pgn       | TSA            | white              | rod                | -          | <i>Acinetobacter lwoffii</i>       | 100%                                   | KR054982.1  | Proteobacteria |
| 53_28   |                           | pgn       | TSA            | orange             | rod                | +          | <i>Bacillus pumilus</i>            | 97%                                    | KR088392.1  | Firmicutes     |
| 40_11   |                           | pgn       | VJ             | black              | ovoid or short rod | +          | <i>Exiguobacterium undae</i>       | 100%                                   | NR_043477.1 | Firmicutes     |
| 40_9    |                           | pgn       | VJ             | black              | ovoid or short rod | +          | <i>Exiguobacterium undae</i>       | 100%                                   | NR_043477.1 | Firmicutes     |
| 53_27   |                           | pgn       | TSA            | orange             | rod                | -          | <i>Stenotrophomonas rhizophila</i> | 100%                                   | KR055001.1  | Proteobacteria |
| 723     |                           | 50_10     | pcn            | TSA                | white              | rod        | +                                  | <i>Bacillus pumilus</i>                | 100%        | KR088392.1     |
|         | 47_9                      | pgn       | TSA            | white              | rod                | +          | <i>Bacillus pumilus</i>            | 100%                                   | KR088392.1  | Firmicutes     |
|         | 51_14                     | pgn       | TSA            | white              | rod                | +          | <i>Bacillus pumilus</i>            | 100%                                   | KR088392.1  | Firmicutes     |
| 730     | 49_7                      | pci       | TSA            | white              | rod                | -          | <i>Pseudomonas fluorescens</i>     | 100%                                   | KR054991.1  | Proteobacteria |

Type of media was used TSA— tryptic soy agar, HE— Hectoen Enteral agar, VJ— Vogel-Johnsson agar; Treatments was pcn— parasited nest, cuckoo egg, non-incubated; pci— parasited nest, cuckoo egg, incubated; pgn— parasited nest, great reed warbler egg, non-incubated; pgi— parasited nest, great reed warbler egg, incubated; ngn— non-parasited nest, great reed warbler egg, non-incubated; ngi— non-parasited nest, great reed warbler egg, incubated.
